# Supplementary material
Source: PubMed Central journal article supplement (PMC5430204)
Supplement: 13197_2017_2607_MOESM1_ESM.pdf [file 13197_2017_2607_MOESM1_ESM.pdf]

## Online Resource 1

Values of the independent variables and their coded forms with their symbols employed in RSM for optimization of enrichment

| Independent Variables | Units | Symbol of the variables | Coded Levels |      |       |
|-----------------------|-------|-------------------------|--------------|------|-------|
|                       |       |                         | -1           | 0    | 1     |
| Mixing speed          | rpm   | $X_1$                   | 4000         | 7000 | 10000 |
| Time                  | sec   | $X_2$                   | 30           | 60   | 90    |
| Solid mass            | ppm   | $X_3$                   | 1000         | 1250 | 1500  |
