# Supplementary material
Source: PubMed Central journal article supplement (PMC5430204)
Supplement: 13197_2017_2607_MOESM2_ESM.pdf [file 13197_2017_2607_MOESM2_ESM.pdf]

## Online Resource 2

FCCD of the independent variables ( $X_1$ ,  $X_2$ ,  $X_3$ ) and experimental results for the TPC and oleuropein\*

| Run number | Independent variables |                |                | Responses    |                     |
|------------|-----------------------|----------------|----------------|--------------|---------------------|
|            | $X_1$<br>(rpm)        | $X_2$<br>(sec) | $X_3$<br>(ppm) | TPC<br>(ppm) | Oleuropein<br>(ppm) |
| 1          | 10000                 | 30             | 1500           | 249±5.19     | 26.36±1.19          |
| 2          | 4000                  | 30             | 1500           | 258±4.29     | 26.08±1.30          |
| 3          | 7000                  | 30             | 1250           | 160±3.09     | 23.54±0.19          |
| 4          | 4000                  | 30             | 1000           | 158±1.25     | 20.62±1.01          |
| 5          | 7000                  | 60             | 1500           | 156±2.01     | 18.00±1.33          |
| 6          | 7000                  | 60             | 1000           | 137±1.01     | 24.25±2.19          |
| 7          | 10000                 | 90             | 1500           | 196±4.44     | 13.26±1.00          |
| 8          | 7000                  | 90             | 1250           | 176±2.98     | 11.07±0.92          |
| 9          | 7000                  | 60             | 1250           | 173±5.00     | 14.17±1.10          |
| 10         | 10000                 | 30             | 1000           | 221±5.02     | 25.37±1.15          |
| 11         | 4000                  | 60             | 1250           | 158±2.21     | 12.00±0.19          |
| 12         | 7000                  | 60             | 1250           | 150±1.14     | 14.00±0.99          |
| 13         | 10000                 | 60             | 1250           | 177±2.91     | 17.33±1.15          |
| 14         | 7000                  | 60             | 1250           | 143±3.33     | 13.50±0.97          |
| 15         | 7000                  | 60             | 1250           | 133±4.01     | 13.90±0.66          |
| 16         | 4000                  | 90             | 1500           | 184±2.81     | 19.02±0.21          |
| 17         | 10000                 | 90             | 1000           | 157±3.03     | 17.33±1.01          |
| 18         | 7000                  | 60             | 1250           | 113±0.98     | 14.00±1.30          |
| 19         | 4000                  | 90             | 1000           | 139±1.15     | 15.96±0.99          |
| 20         | 7000                  | 60             | 1250           | 128±2.17     | 13.94±0.25          |

\*Data are expressed as the mean (n=9) ± S.D.
