# Supplementary material
Source: PubMed Central journal article supplement (PMC5430204)
Supplement: 13197_2017_2607_MOESM3_ESM.pdf [file 13197_2017_2607_MOESM3_ESM.pdf]

### Online Resource 3

ANOVA for the quadratic equations of Design Expert 9.0.6 for the enrichment of TPC in olive oil.

| Source                        | Sum of Squares | df | Mean Square | F value | P-value Prob>F |
|-------------------------------|----------------|----|-------------|---------|----------------|
| Model                         | 22782.92       | 9  | 2531.44     | 5.04    | 0.0093         |
| X <sub>1</sub> -Speed         | 1060.90        | 1  | 1060.90     | 2.11    | 0.1769         |
| X <sub>2</sub> -Time          | 3763.60        | 1  | 3763.60     | 7.49    | 0.0210         |
| X <sub>3</sub> -Mass          | 5336.10        | 1  | 5336.10     | 10.62   | 0.0086         |
| X <sub>1</sub> X <sub>2</sub> | 72.00          | 1  | 72.00       | 0.14    | 0.7130         |
| X <sub>1</sub> X <sub>3</sub> | 760.50         | 1  | 760.50      | 1.51    | 0.2468         |
| X <sub>2</sub> X <sub>3</sub> | 242.00         | 1  | 242.00      | 0.48    | 0.5035         |
| X <sub>1</sub> <sup>2</sup>   | 1725.01        | 1  | 1725.01     | 3.43    | 0.0936         |
| X <sub>2</sub> <sup>2</sup>   | 1794.57        | 1  | 1794.57     | 3.57    | 0.0881         |
| X <sub>3</sub> <sup>2</sup>   | 45.01          | 1  | 45.01       | 0.090   | 0.7709         |
| Residual                      | 5025.28        | 10 | 502.53      |         |                |
| Lack of Fit                   | 2905.28        | 5  | 581.06      | 1.37    | 0.3690         |
| Pure Error                    | 2120.00        | 5  | 424.00      |         |                |
| Cor Total                     | 27808.20       | 19 |             |         |                |
