# Supplementary material
Source: PubMed Central journal article supplement (PMC5430204)
Supplement: 13197_2017_2607_MOESM4_ESM.pdf [file 13197_2017_2607_MOESM4_ESM.pdf]

#### Online Resource 4

ANOVA for the quadratic equations of Design Expert 9.0.6 for the enrichment of oleuropein in olive oil.

| Source                        | Sum of Squares | df | Mean Square | F value | P-value Prob>F |
|-------------------------------|----------------|----|-------------|---------|----------------|
| Model                         | 424.95         | 9  | 47.22       | 9.07    | 0.0009         |
| X <sub>1</sub> -Speed         | 3.56           | 1  | 3.56        | 0.68    | 0.4278         |
| X <sub>2</sub> -Time          | 205.57         | 1  | 205.57      | 39.50   | < 0.0001       |
| X <sub>3</sub> -Mass          | 0.066          | 1  | 0.066       | 0.013   | 0.9128         |
| X <sub>1</sub> X <sub>2</sub> | 11.13          | 1  | 11.13       | 2.14    | 0.1743         |
| X <sub>1</sub> X <sub>3</sub> | 16.82          | 1  | 16.82       | 3.23    | 0.1024         |
| X <sub>2</sub> X <sub>3</sub> | 6.95           | 1  | 6.95        | 1.34    | 0.2745         |
| X <sub>1</sub> <sup>2</sup>   | 2.66           | 1  | 2.66        | 0.51    | 0.4912         |
| X <sub>2</sub> <sup>2</sup>   | 7.55           | 1  | 7.55        | 1.45    | 0.2560         |
| X <sub>3</sub> <sup>2</sup>   | 82.45          | 1  | 82.45       | 15.85   | 0.0026         |
| Residual                      | 52.04          | 10 | 5.20        |         |                |
| Lack of Fit                   | 51.78          | 5  | 10.36       | 203.12  | < 0.0001       |
| Pure Error                    | 0.25           | 5  | 0.051       |         |                |
| Cor Total                     | 476.98         | 19 |             |         |                |
