# Supplementary material
Source: PubMed Central journal article supplement (PMC5430204)
Supplement: 13197_2017_2607_MOESM5_ESM.pdf [file 13197_2017_2607_MOESM5_ESM.pdf]

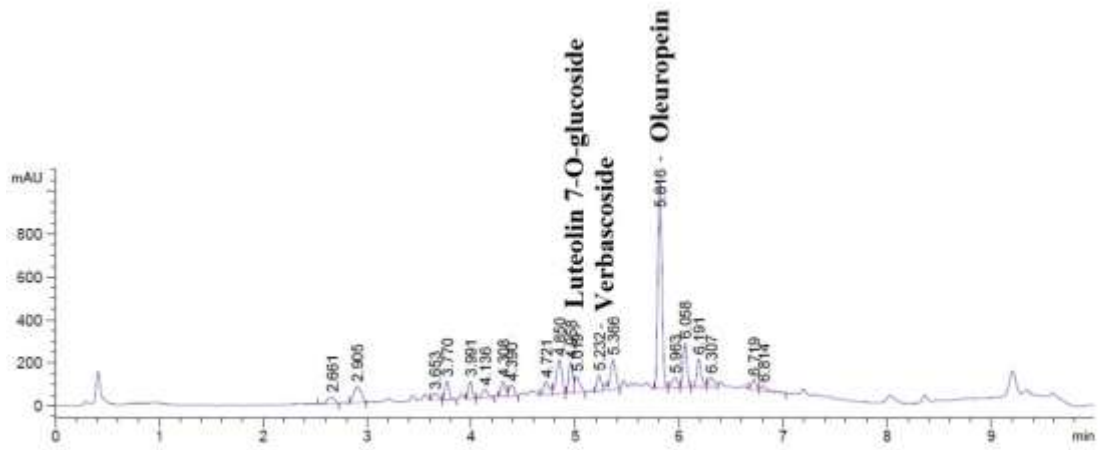

**Online Resource 5** An HPLC chromatogram of the olive leaf extract obtained by HAE at the optimum conditions
