# Supplementary material
Source: PubMed Central journal article supplement (PMC5430204)
Supplement: 13197_2017_2607_MOESM6_ESM.pdf [file 13197_2017_2607_MOESM6_ESM.pdf]

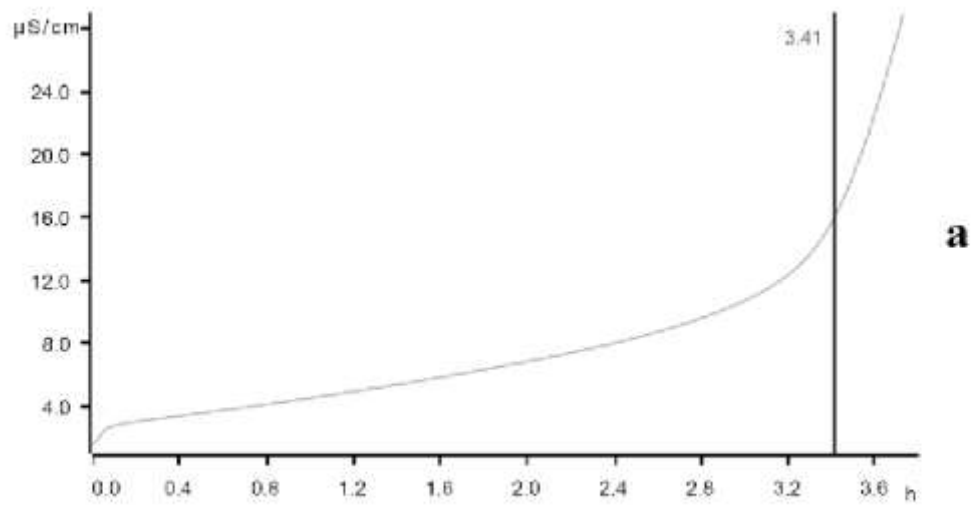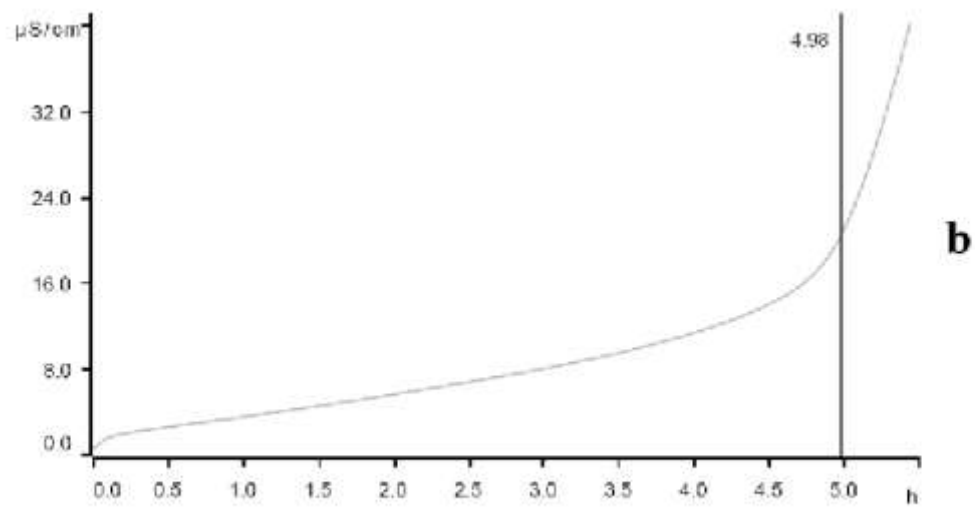

**Online Resource 6** Oxidative stability curves of a) pure olive oil b) olive oil enriched by olive leaf extract.
